# Supplementary material for: Quantum dot–polymer conjugates for stable luminescent displays
Source: Royal Society of Chemistry journal article supplement (doi:10.1039/c8nr01501e), 2018-01-01
Supplement: c8nr01501e1.pdf [file c8nr01501e1.pdf]

## Electronic Supplementary Information

### Quantum Dot-Polymer Conjugates for Stable Luminescent Displays

Sushant Ghimire, Anjali Sivadas, Ken-ichi Yuyama, Yuta Takano, Raju Francis, Vasudevanpillai Biju

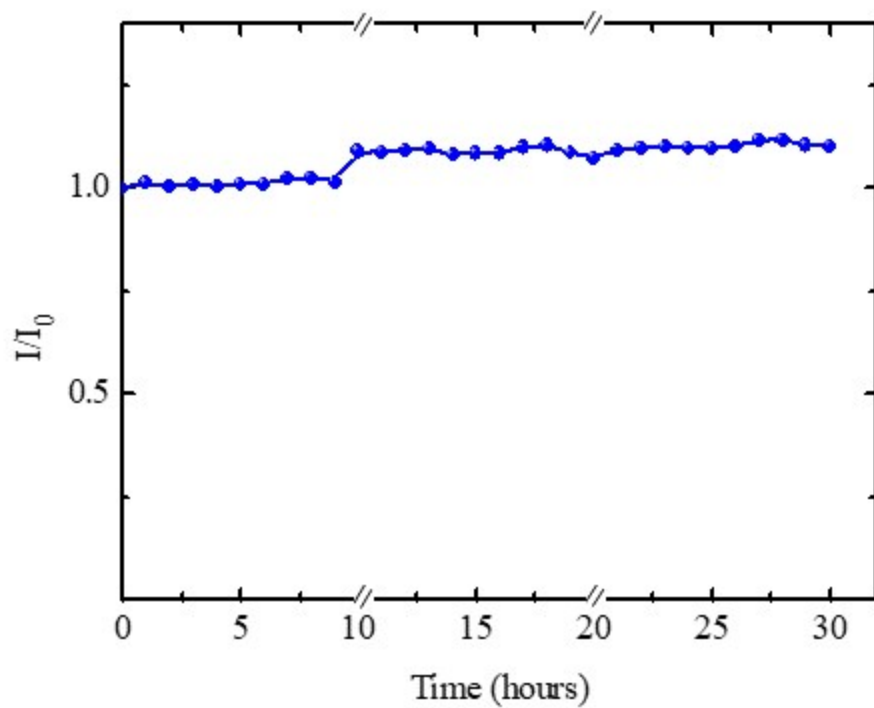

**Figure S1:** PL intensity trajectory of a QDs in solution state recorded for 72 hours under room light for 10 h intervals showing the photostability of the QDs.

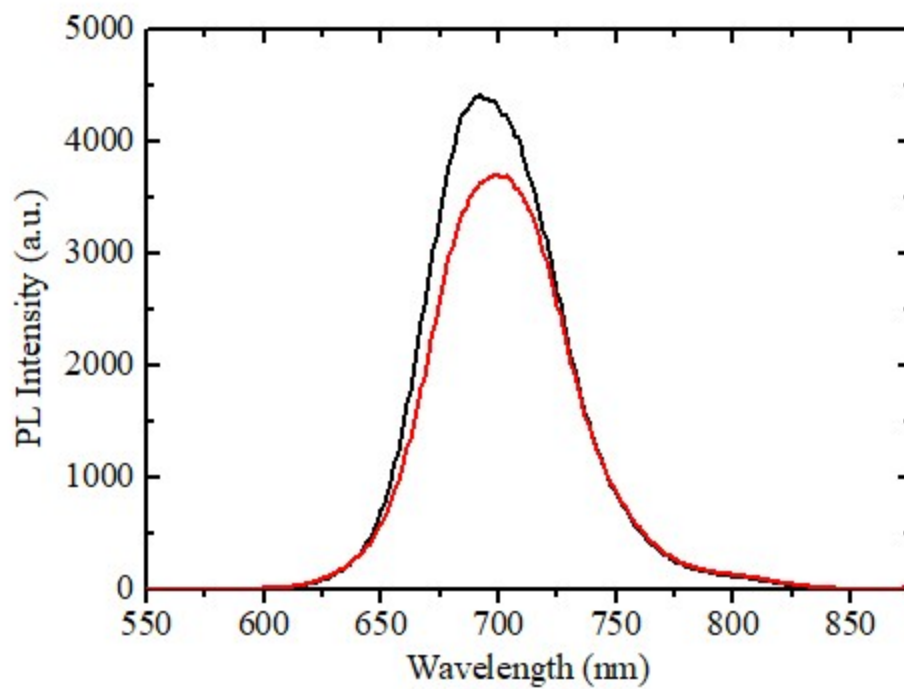

**Figure S2:** PL spectra of QD solution at room temperature and 373 K.
